# Supplementary material for: An extensive disulfide bond network prevents tail contraction in Agrobacterium tumefaciens phage Milano
Source: PubMed Central journal article supplement (PMC10811340; doi:10.1038/s41467-024-44959-z), 2024-01-26
Supplement: 41467_2024_44959_MOESM1_ESM.pdf [file 41467_2024_44959_MOESM1_ESM.pdf]

## **Supplementary information:**

### **An extensive disulfide bond network prevents tail contraction in *Agrobacterium tumefaciens* phage Milano**

Ravi R. Sonani<sup>1</sup>, Lee K. Palmer<sup>2</sup>, Nathaniel C. Esteves<sup>3</sup>, Abigail A. Horton<sup>3</sup>, Amanda L. Sebastian<sup>3</sup>,  
Rebecca J. Kelly<sup>3</sup>, Fengbin Wang<sup>1,5</sup>, Mark A.B. Kreutzberger<sup>1</sup>, William K. Russell<sup>2</sup>, Petr G.  
Leiman<sup>4</sup>, Birgit E. Scharf<sup>3</sup>, Edward H. Egelman<sup>1</sup>

Correspondence to: [pgleiman@utmb.edu](mailto:pgleiman@utmb.edu), [bscharf@vt.edu](mailto:bscharf@vt.edu), [egelman@virginia.edu](mailto:egelman@virginia.edu)

This file contains:

11 Supplementary Figures (S1 – S11) and  
Five Supplementary Tables (S1 – S5)

Figure S1

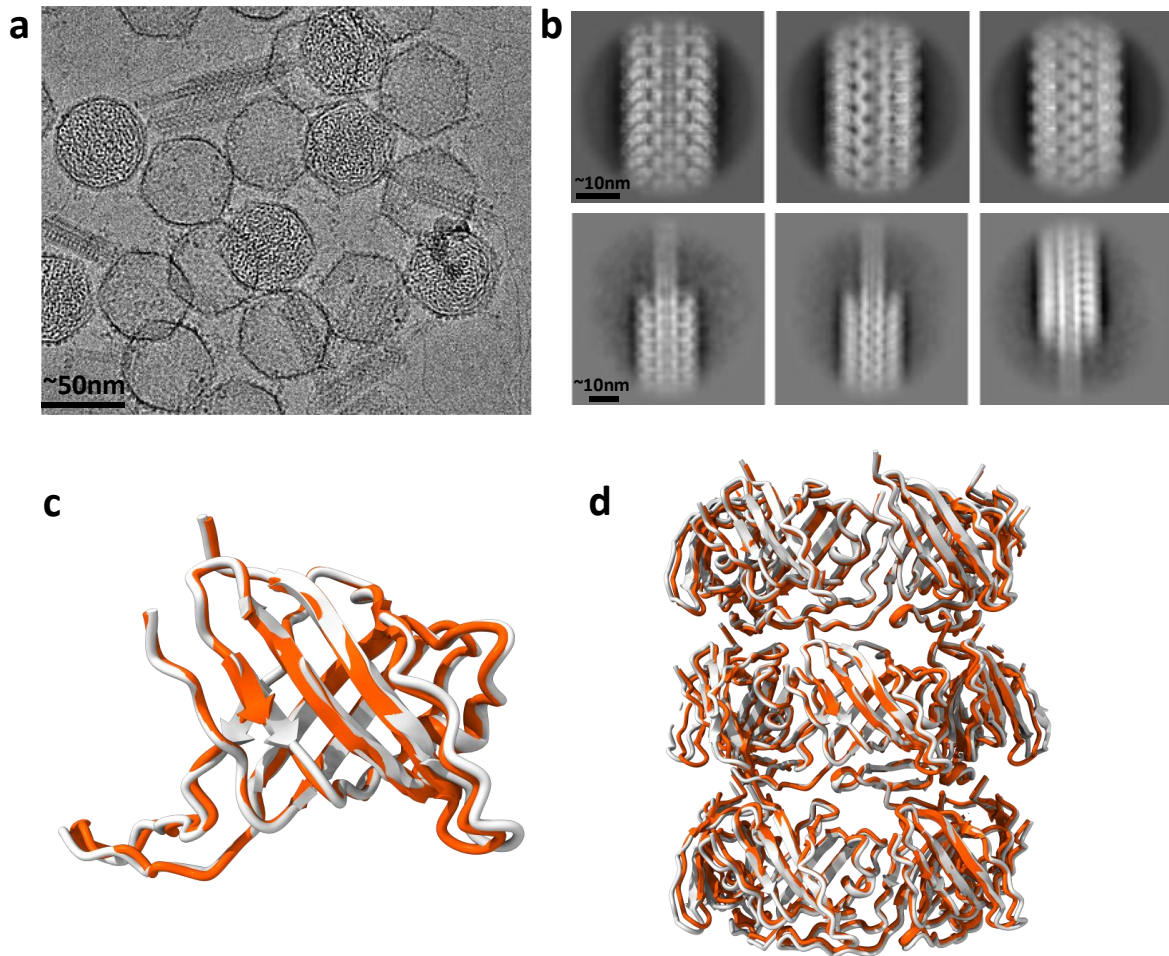

**Figure S1:** (a) Cryo-EM micrograph of contracted Milano phage. (b) Representative 2-D class averages of Milano contracted tail showing its straight morphology. The upper and lower panel show 2D-class averages of middle and end region of the tail. (c-d) Superimposed structures of Milano tail-tube (gp21) protomer (c) and tube (d) in extended (grey) and contracted (orange) state.

Figure S2

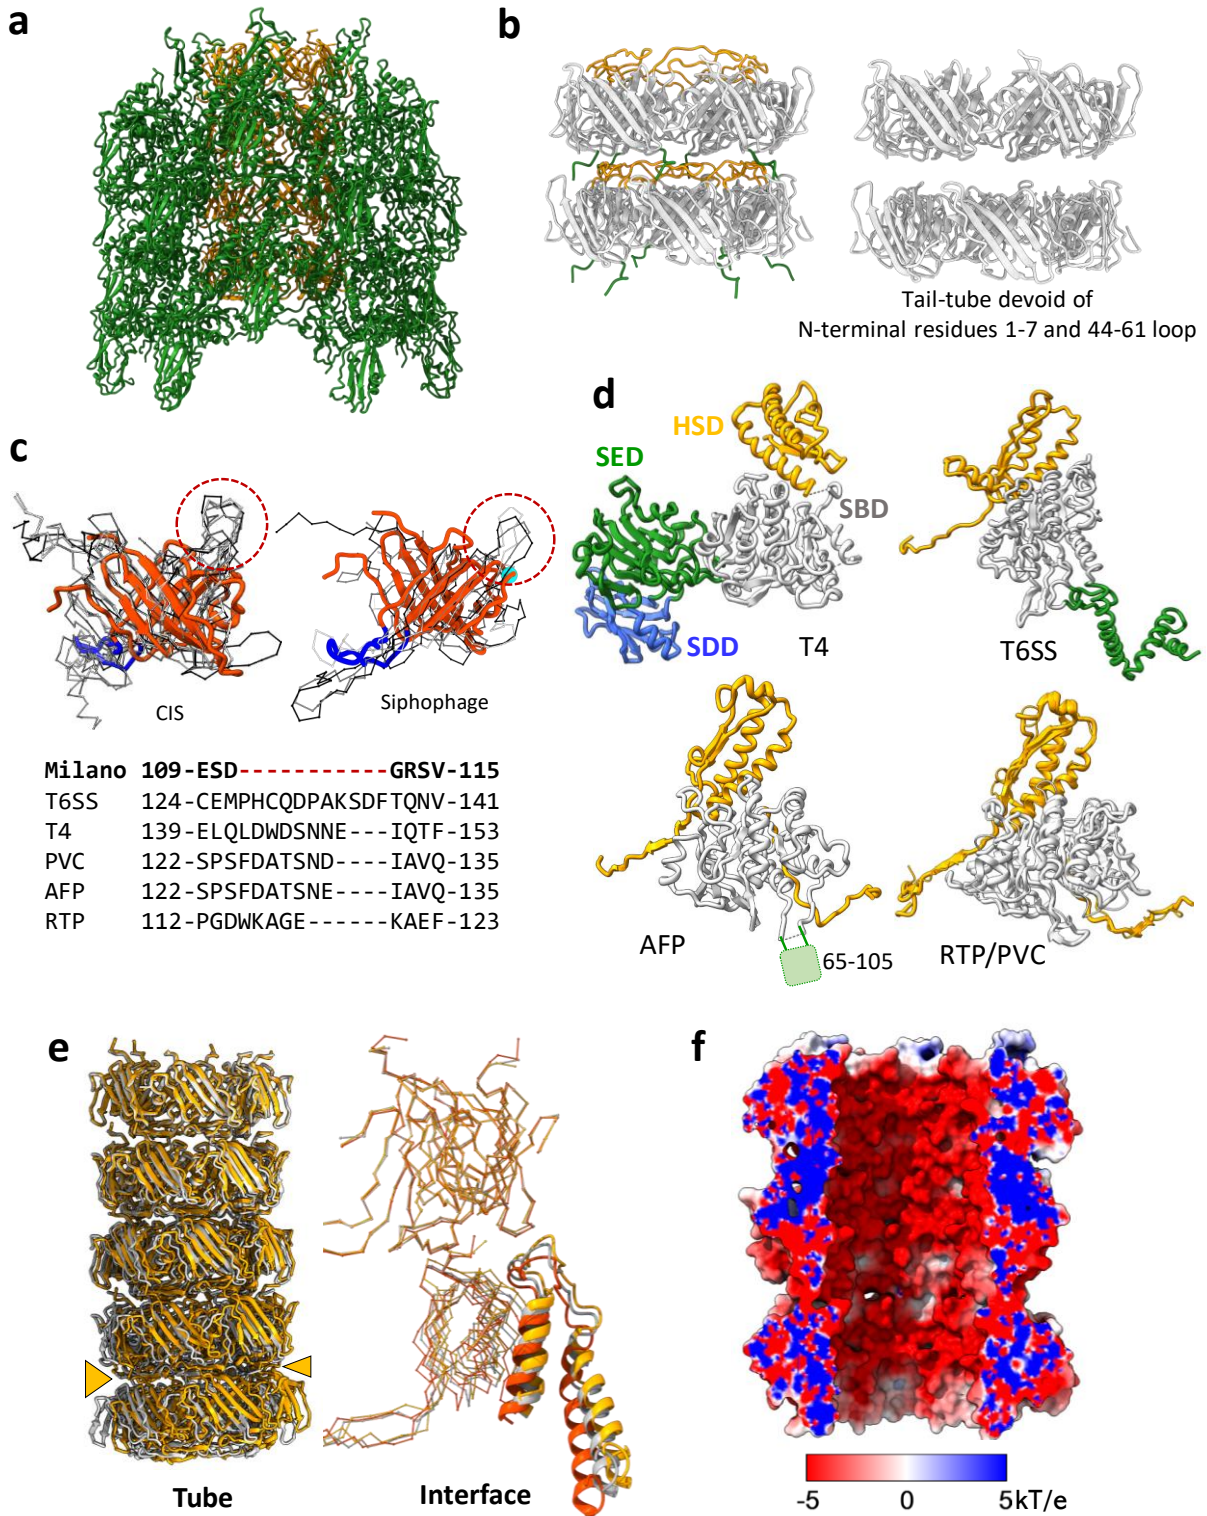

**Figure S2:** (a) Milano tail structure in straight state. Tube (gp21) and sheath (gp20) are colored orange and green, respectively. (b) Helical arrangement of gp21 in tube. The yellow-colored

loop (residues 44-61) establishes the contact with neighboring subunit within hexamer. The inter-hexamer contact is mainly mediated by the N-terminal end (residues 1-7) (green) and 44-61 loop (yellow) as removal of which results in no contact between hexamers (Right panel). **(c)** The structure Milano tube protein gp21 superimposed with tube proteins of other CIS (Left panel; T6SS, Type-VI secretion system; T4, T4 bacteriophage; PVC, *Photorhabdus* virulence cassette; AFP, anti-feeding phage; RTP, R-type pyocin) and non-contractile phage tail-tube proteins (Right panel; Phage SPP1, Phage 80 $\alpha$ , Phage YSD1). The outer domains of SPP1, 80 $\alpha$  and YSD1 are removed for ease of visualization. The sequence alignment (lower panel) reveals absence of specific loop in Milano gp21 (between residues 111-112) compared to tube protein of other CIS. The missing loop is shown by a dashed red circle in the upper structural panel. The lack of this loop results in grooves on Milano tube surface as Shown in main Fig. 1e. **(d)** Structures of sheath proteins of other CISs, T4, T6SS, AFP, RTP and PVC for comparison with Milano sheath protein shown in main Fig. 1f. The sheath handshake (SHD), sheath-body (SBD), sheath-extension (SED), and sheath-decoration (SDD) domains are colored orange, white, green, and blue respectively. **(e)** Comparison of tube and sheath-tube interface between curved (yellow, orange) and baseplate-proximal straight tail segment (grey). Yellow and orange represent subunits at inner and outer surface, respectively. **(f)** Highly negative electrostatic potential of inner surface of Milano tail-tube.

Figure S3

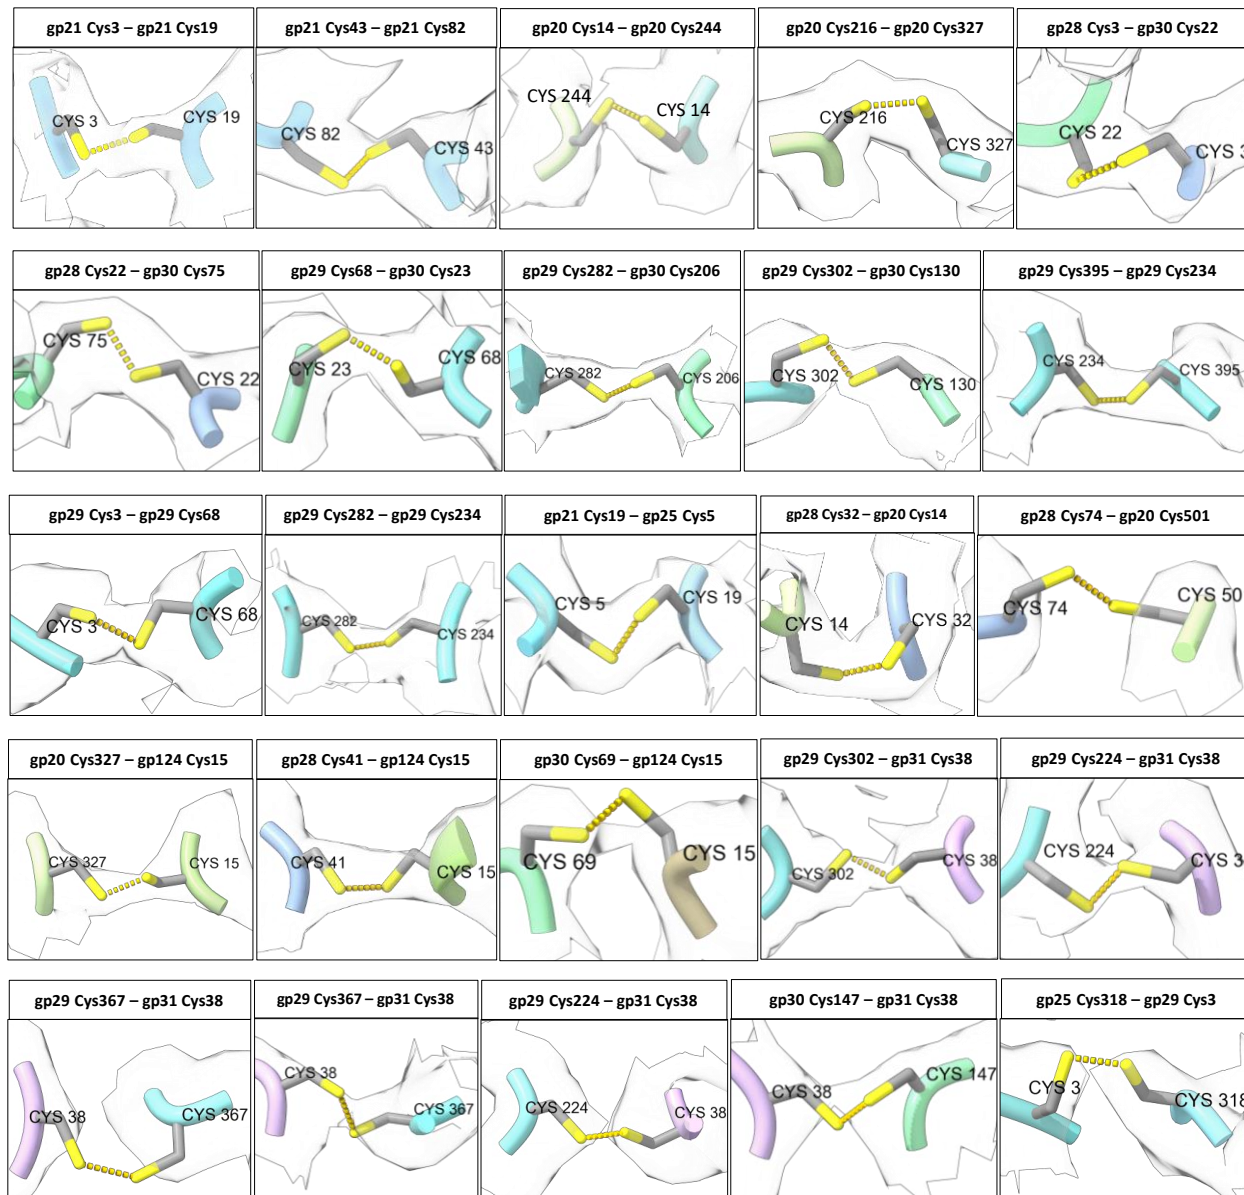

**Figure S3:** Close up view of representative disulfide bonds in Milano tail and baseplate structure with atomic models shown along with the density map. It can be seen that the density for these bonds is quite variable, with some putative disulfides showing no density for the bond. We note that disulfide bonds are remarkably sensitive to radiation, either x-ray or electrons. It has previously been shown at 2.5 Å resolution that the sensitivity of the disulfide bond to radiation is dependent on the local environment, so that with the same radiation dose the density for some disulfide bonds is almost totally lost while others are retained<sup>1</sup>.

Figure S4

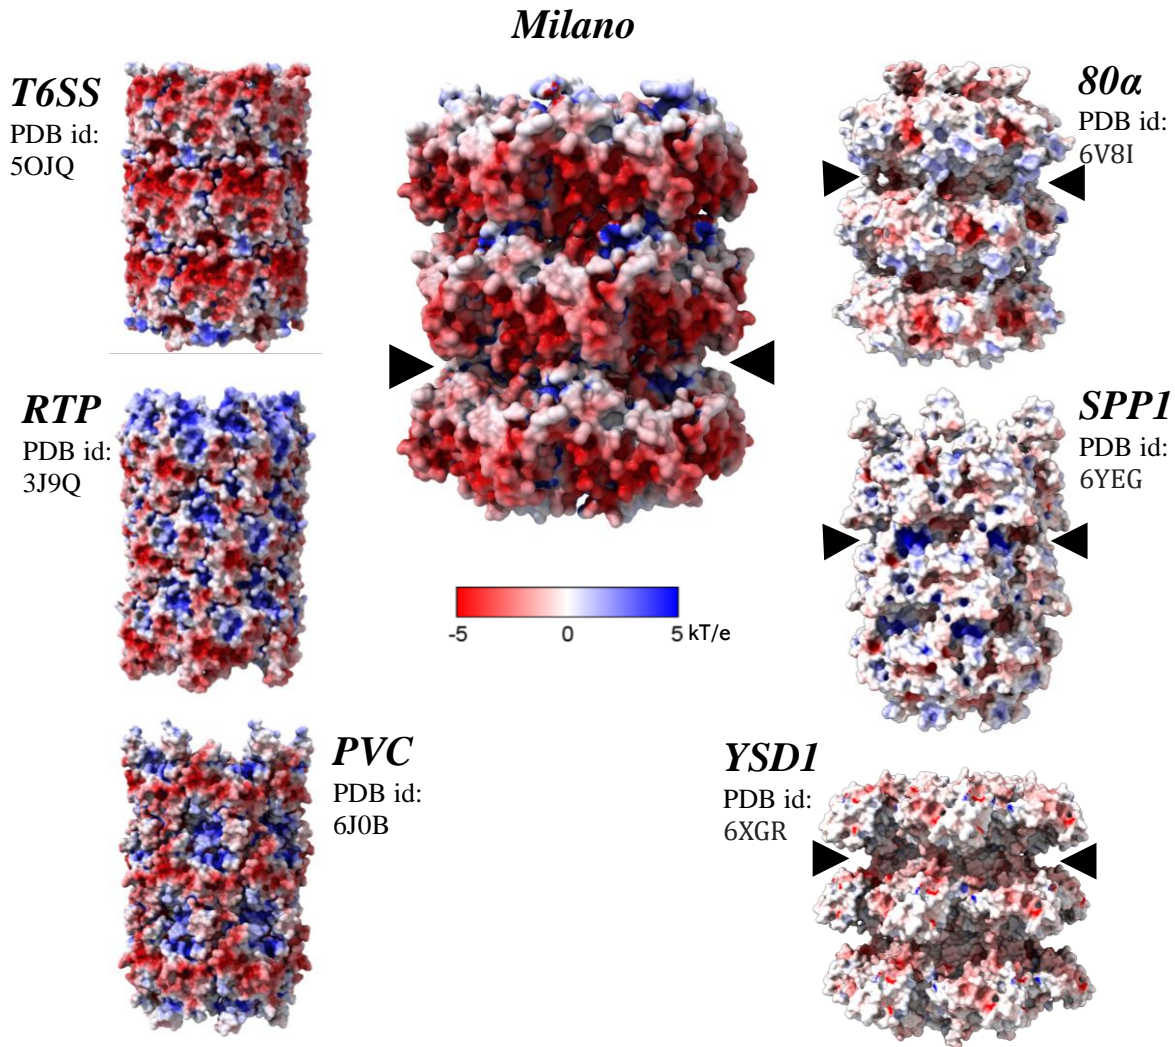

**Figure S4:** Electrostatic potential and surface morphology of Milano tail tube (gp21) in comparison with other contractile injection system (CIS) (left panel) and tube of Siphophages (right panel). T6SS, Type-VI secretion system; RTP, R-type pyocin; PVC, *Photorhabdus* virulence cassette; 80α, *S. aureus* bacteriophage 80α; SPP1, *Bacillus subtilis* bacteriophage SPP1; YSD1, *Salmonella Typhi* bacteriophage YSD1. Unlike other CIS, Milano tail-tube shows substantial grooves as indicated by arrow heads on its surface similar to Siphophage.

Figure S5

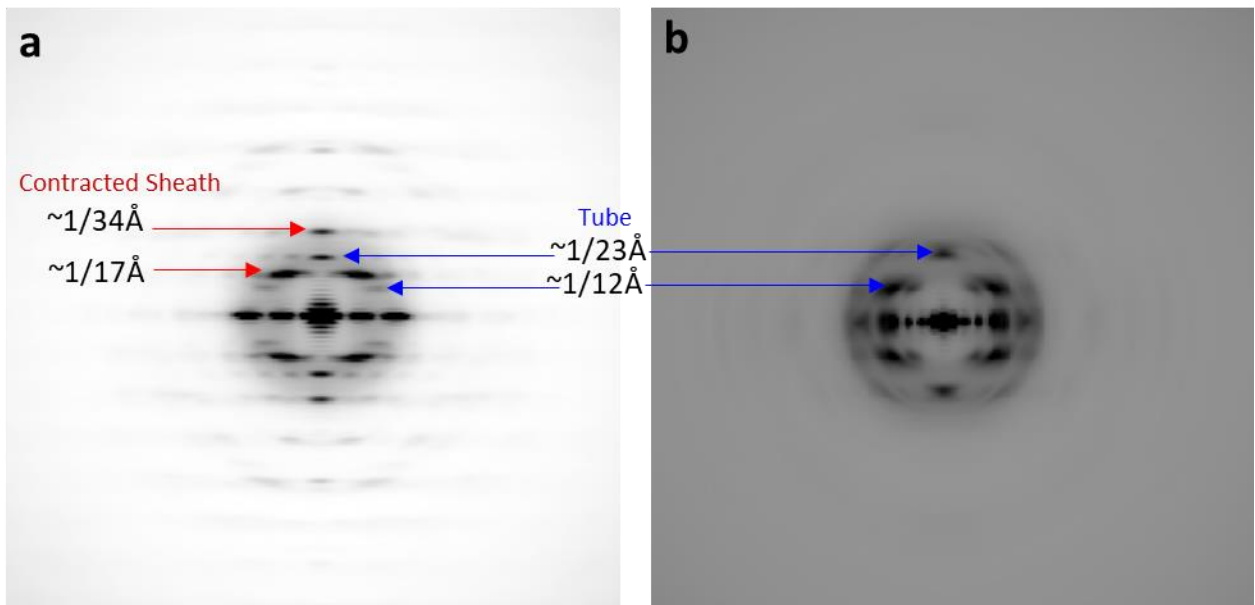

**Figure S5:** Averaged power spectrum of vertically aligned segments of (a) contracted and (b) extended tail of Milano. Contracted tail segments were windowed from both sides to include tube and sheath overlapping to it, which decreases the signal from contracted sheath. The additional layer lines from tube-signal appears and allows indexing of tube helical symmetry, which is similar to extended tube symmetry. Layer lines associated with tube and contracted sheath are marked by blue and red arrows, respectively.

Figure S6

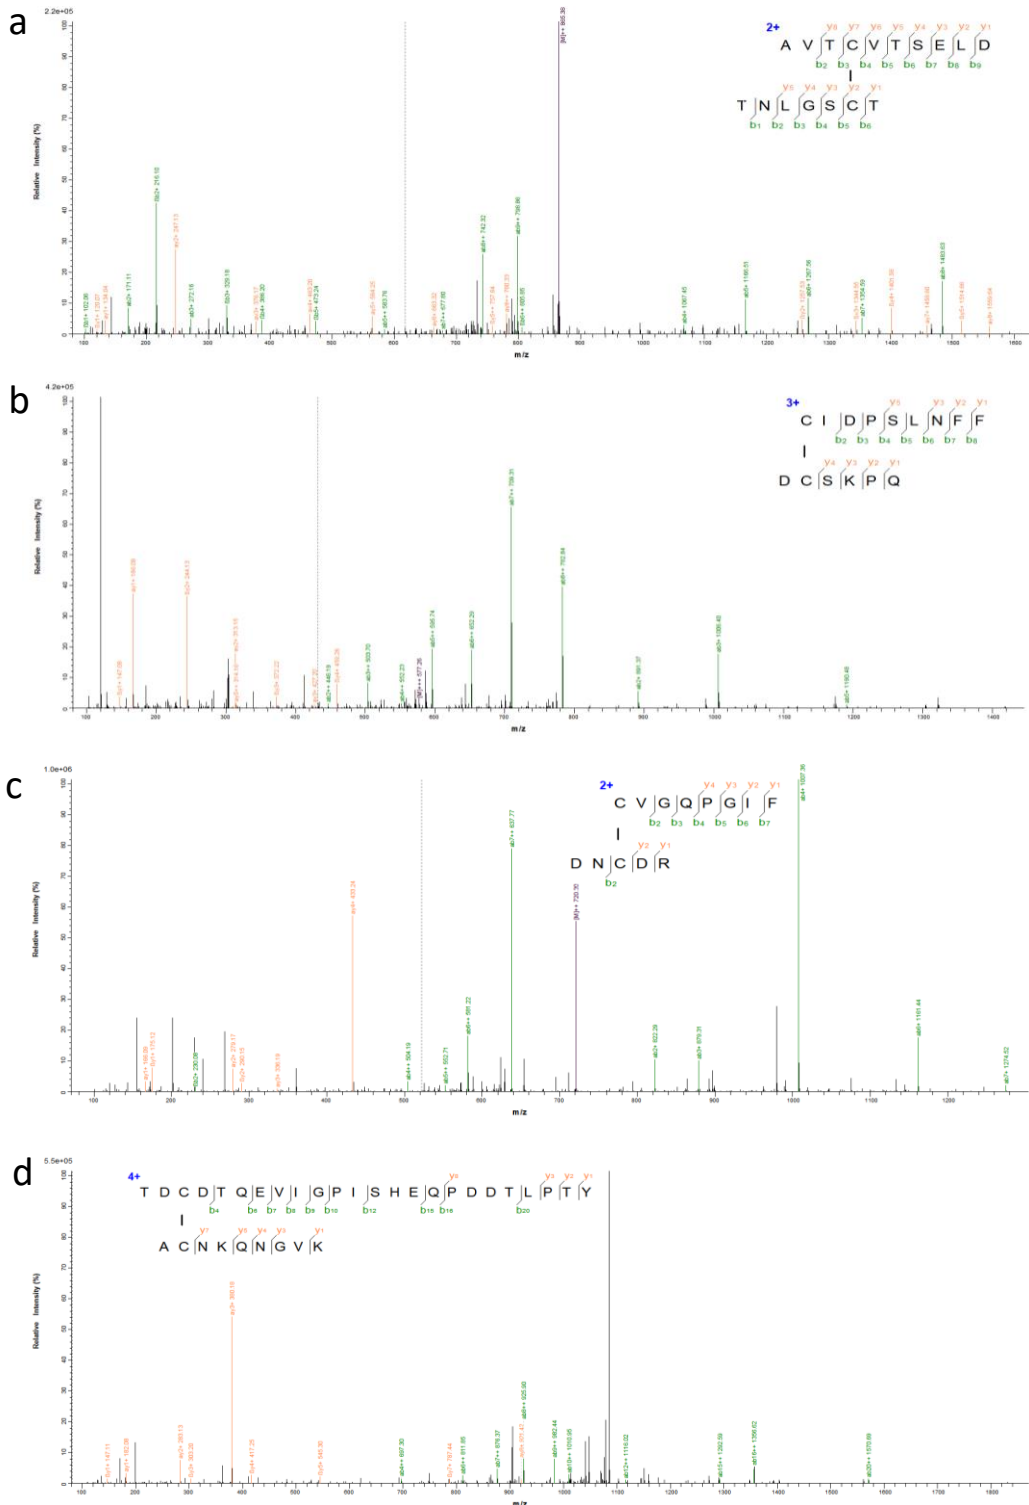

**Figure S6:** Mass spectrometry fragmentation pattern of the inter-chain disulfide bonds of Milano tail-sheath (gp20) and tail-tube (gp21) showing a peak for doubly charged parent mass. **(a)** gp20 Cys47<sub>SBD</sub> - gp20 Cys182<sub>SED</sub>; **(b)** gp20 Cys14<sub>SHD</sub> - gp20 Cys244<sub>SBD</sub>; **(c)** gp20 Cys467<sub>SHD</sub> - gp20 Cys501<sub>SHD</sub> and **(d)** gp21 Cys3 - gp21 Cys19



Figure S7

**a**

1. Agrobacterium phage Milano
2. Agrobacterium phage 7-7-1
3. Agrobacterium phage OLIVR4
4. Rhizobium phage RHph TM40
5. Escherichia phage P2
6. Escherichia phage T4
7. Escherichia phage Mu
8. Staphylococcus phage phiIBB-SEP1
9. Staphylococcus phage Twort
10. Staphylococcus phage Sb1 8383
11. Vibrio phage XM1
12. Vibrio phage Athena1
13. Vibrio phage VBM1
14. Bacillus phage SP01
15. Bacillus phage Evoli
16. Bacillus phage Riley
17. Klebsiella phage KPP95
18. Klebsiella phage JD18
19. Klebsiella phage PKO111
20. Salmonella phage SG1
21. Salmonella phage SP1
22. Salmonella phage PS5

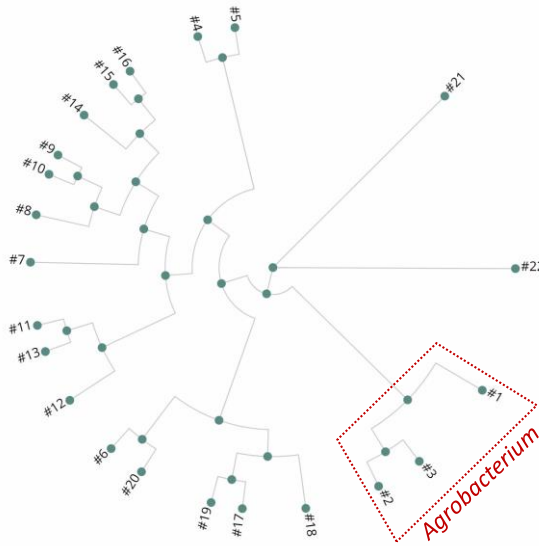

**b**

|     |     |                 |              |             |              |             |               |                  |                   |
|-----|-----|-----------------|--------------|-------------|--------------|-------------|---------------|------------------|-------------------|
| #1  | 1M  | 12RLCID16       | 24EGCKI28    | 45VTCVT49   | 71VFCMCKS77  | 188GSCS184  | 214NECCFA219  | 242WDCSKPQCFG251 |                   |
| #2  | 1M  | 12RLCID16       | 24EGCKI28    | 45VTCVN49   | 71VFCMCKS77  | 188GSCS184  | 214NECCFA219  | 242WDCSKPQCFG251 |                   |
| #3  | 1M  | 12RLCID16       | 24EGCKI28    | 45VTCVT49   | 71VFCMCKS77  | 188GSCS184  | 214NECCFA219  | 242WDCSKPQCFG251 |                   |
| #4  | 1M  | 9KEIDI13        | 21PGLI25     | 48AVLST44   | 73ALQKS      | 77          | 339AN.NPMT338 | 362M-----DC364   |                   |
| #5  | 1M  | 12INEG16        | 24STAIV28    | 47PVLIT51   | 73IADQSK     | 78          | 123AAE.KPR133 | 242-----RA251    |                   |
| #6  | 1M  | 11KETT15        | 23STGT27     | 41IKQVT45   | 71FLQYG      | 75          | 363AD.VDVQ371 | 242Q-----DC251   |                   |
| #7  | 1M  | 22FDNS16        | 34PRQRV38    | 55PVRIR59   | 81FLNANRV87  | 194YAGE     | 197           | 232GDLQYK232     | 255WGP--VNQADG263 |
| #8  | 1M  | 16DYKE20        | 34ASE.TL36   | 53VYKLR57   | 78AWGNSNP    | 86          | 335AHLGGY340  | 363SD--AGEPH369  |                   |
| #9  | 1M  | 16ASIEV20       | 31NSE.IL36   | 58VVQVR54   | 75AWGNSNP    | 81          | 328KNEGGY333  | 356SD--AGEPH362  |                   |
| #10 | 1M  | 19HASIE19       | 31SSE.VF36   | 50VYELR54   | 75AWGNSNP    | 83          | 328AHEGGY333  | 356SD--AGEPH362  |                   |
| #11 | 1M  | 11SLQQE15       | 23NMNAV27    | 43YRIYR47   | 69FFDTTPN75  | 195TSAVL199 | 232SEVNIK236  | 261-----NM262    |                   |
| #12 | 1M  | 11SLQQE15       | 23NMNAV27    | 43YRIYR47   | 69FFETT.SA79 | 195TSAVL199 | 232AEVNIK236  | 261-----NM262    |                   |
| #13 | 1M  | 11SLQQE15       | 23NMNAV27    | 43YRIYR47   | 69FFETT.SA79 | 195TSAVL199 | 232AAVNIK236  | 261-----NM262    |                   |
| #14 | 1M  | 19AYGSI23       | 33S.SNIP40   | 54VLWYT58   | 79MFSP.GGG89 | -----       | 318KKQYSD315  | 338EN--RKQRQ344  |                   |
| #15 | 1M  | 13PRTE17        | 28VRS.PL34   | 48VEVVT52   | 73AWNP.LGG83 | -----       | 318ADSGGY315  | 338SS--AGNQL344  |                   |
| #16 | 1M  | 13PRTE17        | 28AQS.PV34   | 48PVEL52    | 73AWNP.VGG83 | -----       | 309ADLGGY314  | 337ST--SGNQL343  |                   |
| #17 | 1M  | 11KETS15        | 23ATGRA27    | 41VTQIT45   | 71FLQYG      | 75          | 361GD.LRVN369 | 399Q-----DC481   |                   |
| #18 | 1M  | 11KETS15        | 23ATGRA27    | 41VTQIT45   | 71FLQYG      | 75          | 361GD.LRVN369 | 399Q-----DC481   |                   |
| #19 | 1M  | 11KETS15        | 23ATGRA27    | 41VTQIT45   | 71FLQYG      | 75          | 361GD.LRVN369 | 399Q-----DC481   |                   |
| #20 | 1M  | 11KETT15        | 23STGT27     | 41IKQVT45   | 71FLQYG      | 75          | 363AD.VDVQ371 | 401Q-----DC483   |                   |
| #21 | 1M  | 1MAT3           | 27VVVQG31    | 45PVLVT49   | 76FLSYS      | 88          | 340NN.YDAK354 | 377K-----DT379   |                   |
| #22 | 1M  | 16ERDAT20       | 27VVVQG31    | 45PVLVT49   | 76FLSYS      | 88          | 312WVYTF316   | 347N.AYDAK354    | 377K-----DT379    |
| #1  | --- | 298SACSTCEN385  | 318LSCIN322  | 325ESCTP329 | 465PKCVG469  | 499DNCOR583 | ---           | ---              |                   |
| #2  | --- | 298SACSTCEN385  | 318LSCIN322  | 325ESCTP329 | 465PKCVG469  | 499DNCOR583 | ---           | ---              |                   |
| #3  | --- | 298SACSTCEN385  | 318LSCIN322  | 325ESCTP329 | 465PKCVG469  | 499DNCOR583 | ---           | ---              |                   |
| #4  | --- | 429VSETAD.YE437 | 450L.NVI453  | 455--VRR457 | ---          | ---         | ---           | 688              |                   |
| #5  | --- | 215RAKIDQ.QC223 | 233VNGVT237  | 239--ISA241 | 355          | ---         | ---           | 396              |                   |
| #6  | --- | 298CARTDN.SQ385 | 318ILNVI322  | 325--LAI329 | 618          | ---         | ---           | 659              |                   |
| #7  | --- | 311ASQALSID318  | 328LPGRM332  | 334PAVGD338 | 467          | ---         | ---           | 495              |                   |
| #8  | --- | 428ASGL---      | 442L.HVN445  | 447--LDN449 | ---          | ---         | ---           | 594              |                   |
| #9  | --- | 421VSGL---      | 445L.FVN438  | 440--LDK442 | ---          | ---         | ---           | 587              |                   |
| #10 | --- | 421ASGL---      | 445L.R.VS438 | 441--DQ442  | ---          | ---         | ---           | 583              |                   |
| #11 | --- | 312MH--TVLF317  | 331L-SVT334  | 336--E336   | 464          | ---         | ---           | 503              |                   |
| #12 | --- | 312MH--TVLF317  | 331L-SVP334  | 336--E336   | 464          | ---         | ---           | 503              |                   |
| #13 | --- | 312MH--TVLF317  | 331L-SVV334  | 336--E336   | 464          | ---         | ---           | 503              |                   |
| #14 | --- | 403VAGV---      | 417FN-LV420  | 423--GR424  | ---          | ---         | ---           | 571              |                   |
| #15 | --- | 403ASGL---      | 417MN-ID420  | 423--NL424  | ---          | ---         | ---           | 503              |                   |
| #16 | --- | 402ASGL---      | 416MN-NIE419 | 421--LGK423 | ---          | ---         | ---           | 503              |                   |
| #17 | --- | 476CARTDD.AQ484 | 497ILNCI501  | 503--LAI505 | 617          | ---         | ---           | 657              |                   |
| #18 | --- | 476CARTDD.AQ484 | 497ILNCI501  | 503--LAI505 | 617          | ---         | ---           | 657              |                   |
| #19 | --- | 476CARTDD.AQ484 | 497ILNCI501  | 503--LAI505 | 617          | ---         | ---           | 657              |                   |
| #20 | --- | 478CARTDN.SQ486 | 499ILNVI503  | 505--LAI507 | 618          | ---         | ---           | 659              |                   |
| #21 | --- | 445WARSIE.AG453 | 466YNNYN470  | 472--MAW474 | 585          | ---         | ---           | 631              |                   |
| #22 | --- | 445WARSIE.AG453 | 466YNNYN470  | 472--MAW474 | 585          | ---         | ---           | 631              |                   |

**Figure S7: (a)** Phylogenetic tree of bacteriophages constructed using their sheath protein sequence. **(b)** Structural alignment of Milano sheath protein with other bacteriophage sheath proteins by DALI. Structures were predicted using AlphaFold. The presence of cysteine residues involved in disulfide bonds are conserved in the specific bacteriophage clade infecting the *Agrobacterium*.

Figure S8

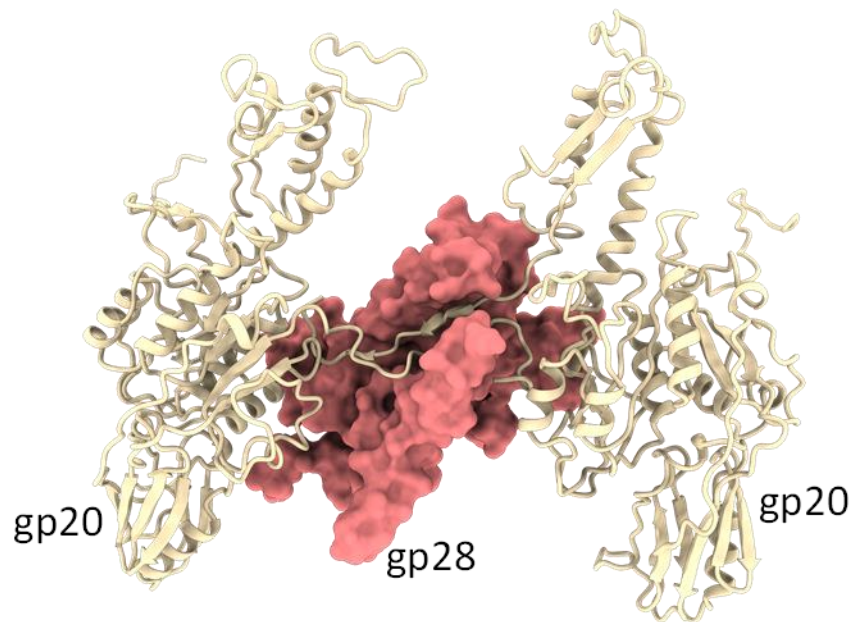

**Figure S8:** The  $\beta$ -sheet augmentation interaction between baseplate wedge 1 (BW1, gp28) and tail-sheath (gp20) proteins in Milano.

Figure S9

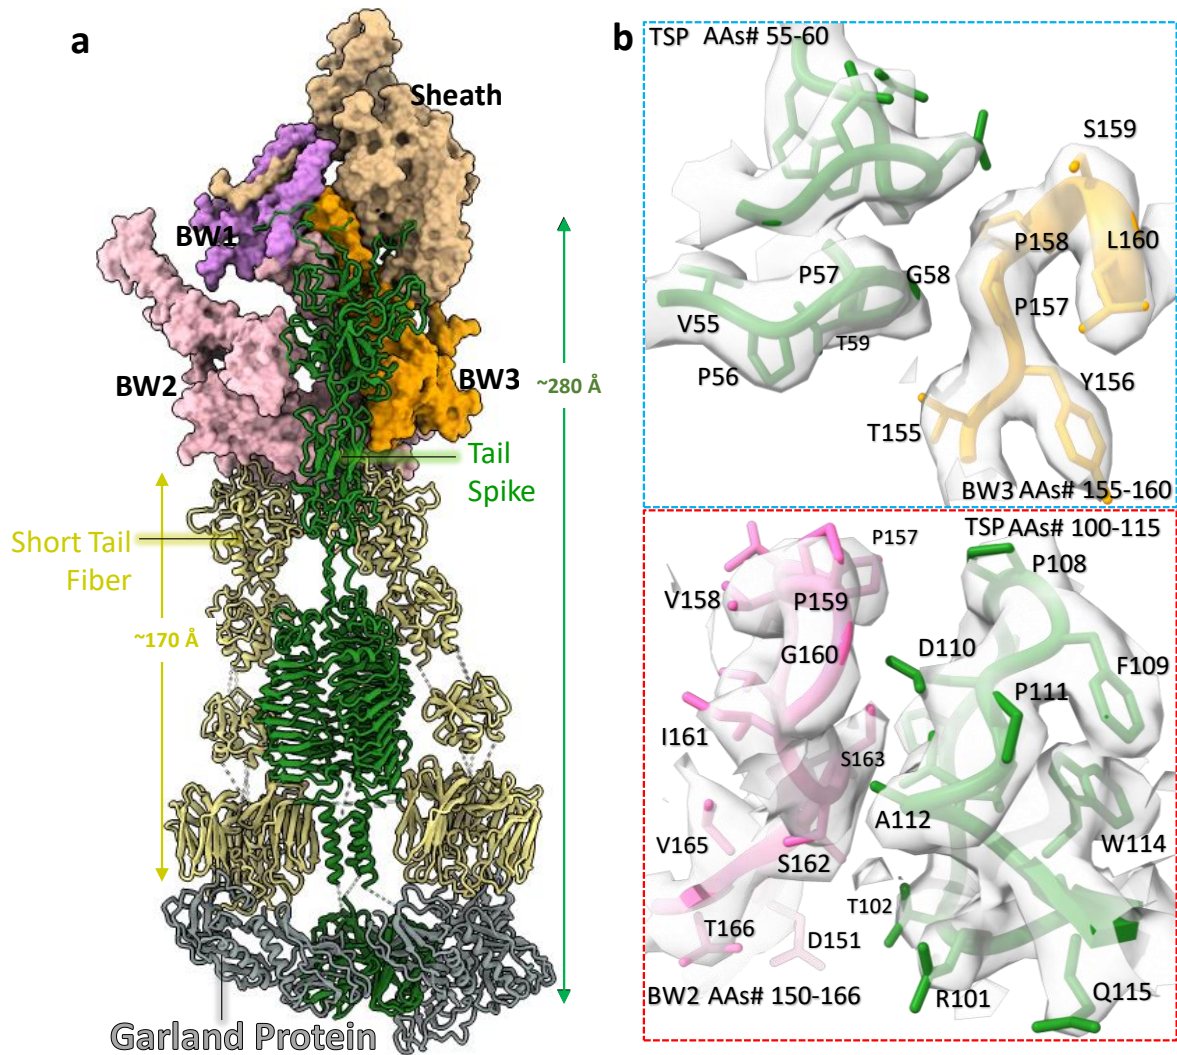

**Figure S9:** Tail-spike assembly and its interactions with baseplate. (a) Tail spike assembly (ribbon model) attached to the baseplate (surface model). Garland protein envelopes the distal parts (C-terminal domains) of TSP and STF proteins. The color scheme is the same as Fig. 3. (b) TSP interactions with baseplate wedge proteins: Enlarged view of interacting surfaces (blue and red boxes in Fig. 5b) in ribbon and stick model.

Figure S10

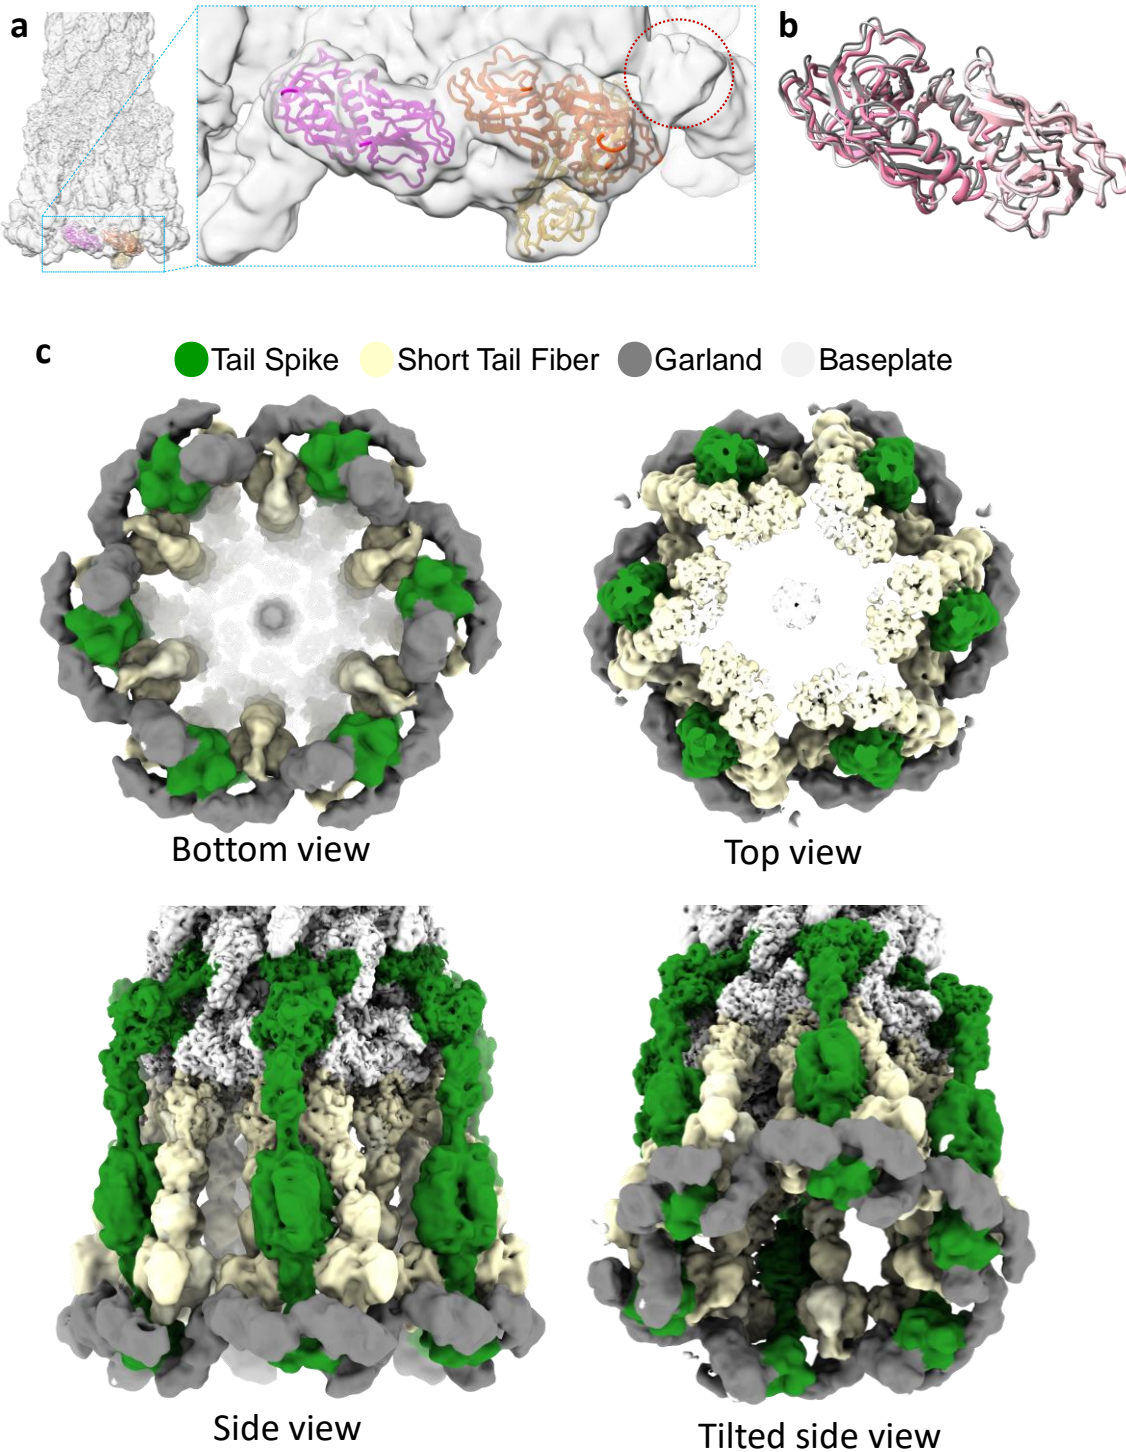

**Figure S10:** (a) Three dimer of garland proteins (gp125<sub>2</sub>, gp127<sub>2</sub> or gp125-gp127) fitted in to cryo-EM map. The red circle indicates the undefined density blob as described in text. (b) Superimposed dimer of garland proteins. gp127<sub>2</sub>, silver; gp125<sub>2</sub>, grey; gp125-gp127, gp125 and gp127 are colored in dark and light pink, respectively. (c) Visualization of the receptor binding complex and garland of Milano depicted through a density map from various perspectives.

Figure S11

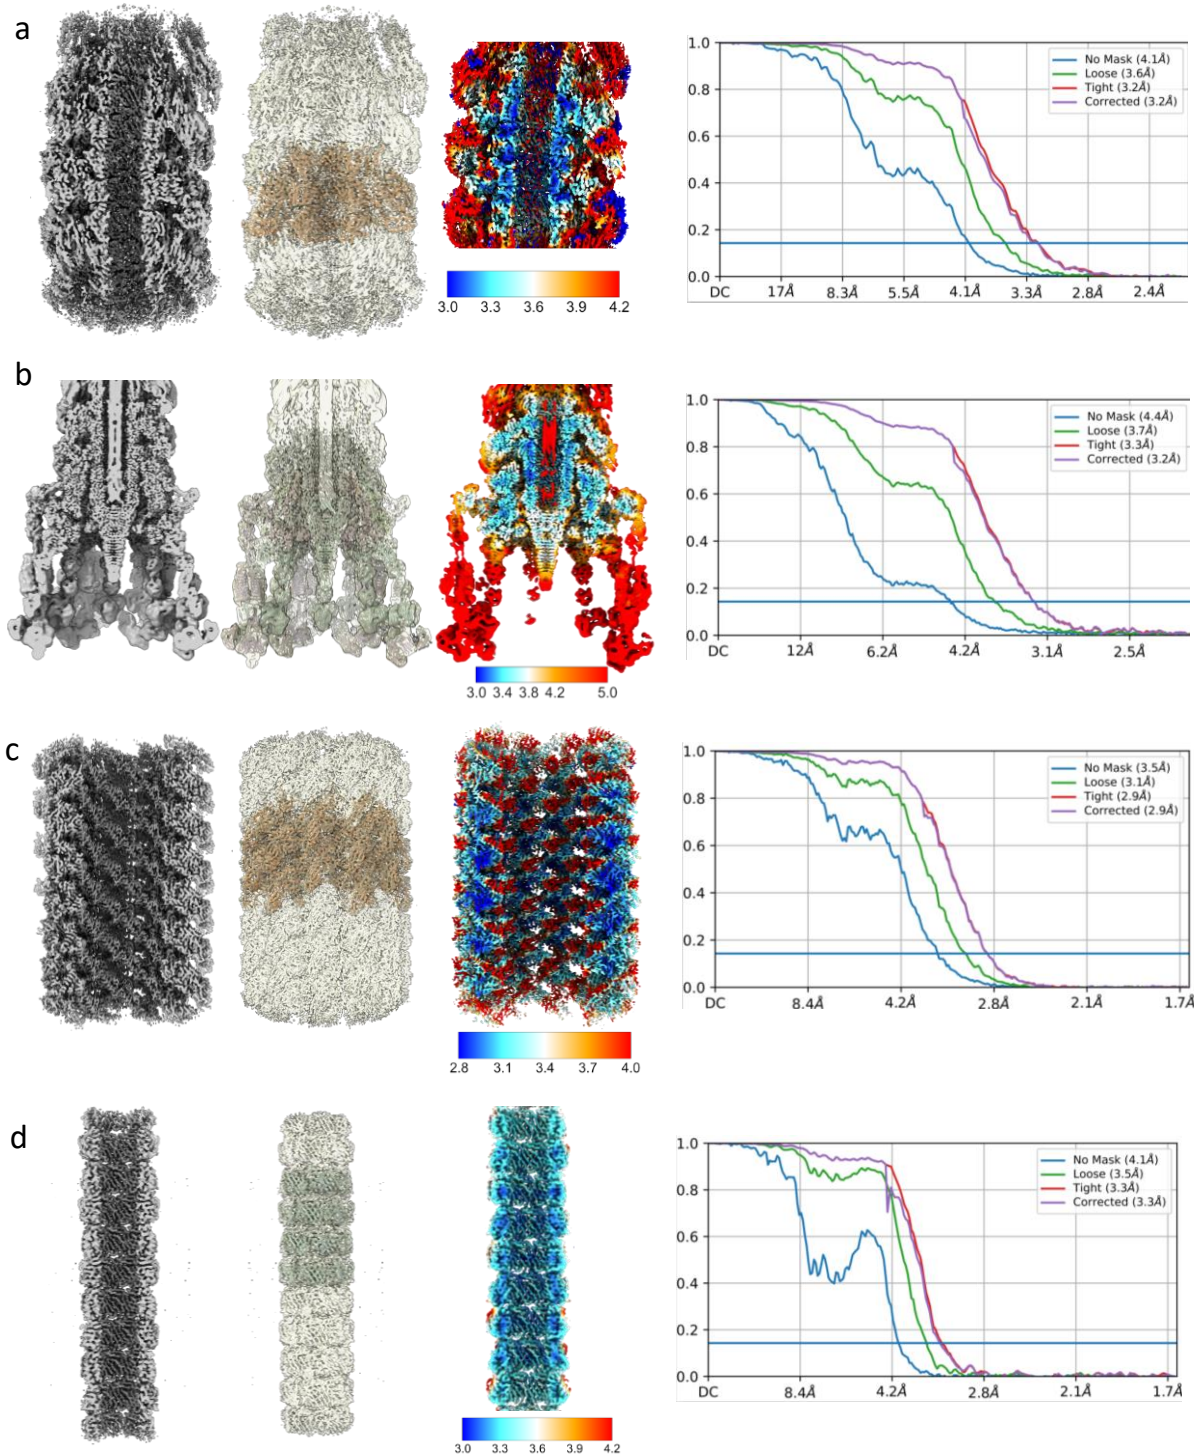

**Figure S11:** Left-to-right, the experimental density map, model-to-map fitting, local resolution map and map:map FSC calculation curves (with 0.143 cutoff) of all reconstructions described in the manuscript. **(a)** The curved-tail asymmetric reconstruction, **(b)** The C3-symmetrically averaged baseplate reconstruction, **(c)** The contracted tail-sheath helical reconstruction, and **(d)** The contracted tail-tube helical reconstructions, as detailed in Table S5.

**Table S1:** Identification of the disulfide bonds in Mass Spectrometry data using pLink2<sup>2</sup> (Version 2.3.9, pFind Team, Beijing, China). The E-value is the expectation value for the whole disulfide bonded peptide pair. The Score is the measurement for false discovery rate (FDR) calculation.

| Milano disulfides identified | Number of unique peptides representing site | Best scoring peptide sequence                                      | Best E-value | Best Score |
|------------------------------|---------------------------------------------|--------------------------------------------------------------------|--------------|------------|
| gp20 cys 47 - gp20 cys 182   | 7                                           | AVT <b>C</b> VTSEL-TNLGS <b>C</b> T                                | 1.95E-12     | 2.80E-07   |
| gp20 cys 14 - gp20 cys 244   | 3                                           | <b>C</b> IDPSLNFF-D <b>C</b> SKPQ                                  | 3.31E-14     | 3.47E-02   |
| gp20 cys 467 - gp20 cys 501  | 4                                           | <b>C</b> VGQPGIF-DN <b>C</b> DR                                    | 5.10E-11     | 3.31E-01   |
| gp21 cys 3 - gp21 cys 19     | 3                                           | A <b>C</b> NKQNGVK-<br>TD <b>C</b> DTQEIVIGPISHEQPDDLPT <b>C</b> Y | 4.41E-20     | 1.44E-01   |

**Table S2:** Results of DALI structural similarities search for C-terminal domain (residues 170-300) of short tail fiber – gp31

| # No | PDB-ChainID | Z   | rmsd | lali | nres | %id | Molecules Description                            |
|------|-------------|-----|------|------|------|-----|--------------------------------------------------|
| 1    | 6wpx-B      | 7.9 | 2.5  | 89   | 451  | 6   | BLEST2                                           |
| 2    | 3afg-B      | 7.7 | 2.2  | 84   | 507  | 8   | SUBTILISIN-LIKE SERINE PROTEASE                  |
| 3    | 5gu5-A      | 7.1 | 3.0  | 86   | 108  | 8   | TRANSMEMBRANE EMP24 DOMAIN-CONTAINING PROTEIN 5  |
| 4    | 2k46-A      | 6.5 | 3.1  | 92   | 190  | 8   | MGC80075 PROTEIN                                 |
| 5    | 2yyo-A      | 6.5 | 2.6  | 97   | 160  | 4   | SPRY DOMAIN-CONTAINING PROTEIN 3                 |
| 6    | 7b2s-A      | 6.4 | 3.1  | 106  | 172  | 3   | E3 UBIQUITIN-PROTEIN LIGASE TRIM9                |
| 7    | 8beq-A      | 6.3 | 3.6  | 102  | 534  | 12  | FRUCTOFURANOSIDASE FROM RHODOTORULA DAIRENENSIS  |
| 8    | 6i56-A      | 6.1 | 2.9  | 86   | 279  | 10  | PHAGE-LIKE ELEMENT PBSX PROTEIN XEPA             |
| 9    | 5azx-A      | 6.0 | 2.4  | 78   | 100  | 9   | TRANSMEMBRANE EMP24 DOMAIN-CONTAINING PROTEIN 10 |
| 10   | 6nob-A      | 6.0 | 3.3  | 96   | 634  | 7   | BETA-FRUCTOFURANOSIDASE                          |
| 11   | 3ldk-A      | 5.9 | 3.4  | 109  | 634  | 11  | FRUCTOSYLTRANSFERASE                             |
| 12   | 2qfe-A      | 5.9 | 2.4  | 84   | 139  | 6   | CALPAIN-7                                        |
| 13   | 2wfk-A      | 5.9 | 3.1  | 102  | 255  | 3   | LIPL32                                           |
| 14   | 7oa8-A      | 5.8 | 3.6  | 104  | 376  | 7   | PILC MINOR PILIN                                 |
| 15   | 3o12-A      | 5.7 | 3.1  | 101  | 185  | 3   | UNCHARACTERIZED PROTEIN YJL217W                  |
| 16   | 4uyb-A      | 5.6 | 2.6  | 83   | 400  | 6   | SEC14-LIKE PROTEIN 3                             |
| 17   | 4ffg-A      | 5.6 | 3.7  | 108  | 480  | 6   | LEVAN FRUCTOTRANSFERASE                          |
| 18   | 5iku-A      | 5.6 | 2.2  | 79   | 240  | 9   | COLLAGENASE                                      |
| 19   | 7js4-A      | 5.6 | 2.9  | 86   | 953  | 7   | F5/8 TYPE C DOMAIN PROTEIN                       |
| 20   | 7nsb-a      | 5.5 | 3.4  | 106  | 568  | 5   | VACUOLAR IMPORT AND DEGRADATION PROTEIN 30       |
| 21   | 8bv0-B      | 5.5 | 2.9  | 97   | 206  | 9   | NRC1                                             |
| 22   | 6e57-A      | 5.5 | 2.6  | 86   | 399  | 8   | SURFACE GLYCAN BINDING PROTEIN B                 |
| 23   | 6s44-A      | 5.4 | 3.3  | 90   | 146  | 6   | CAPSID PROTEIN                                   |
| 24   | 6r3u-A      | 5.4 | 3.3  | 106  | 495  | 4   | GLYCOSIDE HYDROLASE FAMILY 32                    |
| 25   | 2bvb-A      | 5.3 | 3.2  | 89   | 137  | 8   | MICRONEMAL PROTEIN 1                             |

**Table S3:** Identification of structural proteins in Milano by mass spectrometry. Procedure: The Milano phage sample was reduced and alkylated with carbamidomethylated before digestion by trypsin. Digested phage sample in 0.1% formic acid is injected on a Dionex Ultimate 3000 nano-LC system (Thermo Scientific) coupled to a Bruker Maxis Impact QTOF mass spectrometer for MS/MS analysis. The results were analyzed against the Milano proteome using Mascot software.

| <b>Id#</b> | <b>Id</b>                          | <b>Protein name</b>                                                                                      | <b>Coverage</b> | <b>MW</b> | <b>Score</b> |
|------------|------------------------------------|----------------------------------------------------------------------------------------------------------|-----------------|-----------|--------------|
| 1.1        | tr A0A482MFS6 A0A482MFS6_9CAU<br>D | Major capsid protein<br>OS=Agrobacterium phage Milano<br>OX=2557550<br>GN=Milano_009<br>PE=4 SV=1        | 60.9 %          | 5251<br>2 | 2163         |
| 1.2        | tr A0A482MHM7 A0A482MHM7_9CAU<br>D | Tape measure protein<br>OS=Agrobacterium phage Milano<br>OX=2557550<br>GN=Milano_024<br>PE=4 SV=1        | 43.3 %          | 8229<br>6 | 1333         |
| 1.3        | tr A0A482MFS8 A0A482MFS8_9CAU<br>D | Tail sheath protein<br>OS=Agrobacterium phage Milano<br>OX=2557550<br>GN=Milano_020<br>PE=4 SV=1         | 33.6 %          | 5473<br>9 | 940          |
| 1.4        | tr A0A482MFU4 A0A482MFU4_9CAU<br>D | Baseplate protein<br>OS=Agrobacterium phage Milano<br>OX=2557550<br>GN=Milano_029<br>PE=4 SV=1           | 47.5 %          | 4423<br>5 | 916          |
| 1.5        | tr A0A482MFW7 A0A482MFW7_9CAU<br>D | Portal protein<br>OS=Agrobacterium phage Milano<br>OX=2557550<br>GN=Milano_007<br>PE=4 SV=1              | 32.9 %          | 4593<br>1 | 571          |
| 1.6        | tr A0A482MHC6 A0A482MHC6_9CAU<br>D | Virion-associated protein<br>OS=Agrobacterium phage Milano<br>OX=2557550<br>GN=Milano_001<br>PE=4 SV=1   | 18.7 %          | 5290<br>1 | 559          |
| 1.7        | tr A0A482MHF3 A0A482MHF3_9CAU<br>D | Virion-associated protein<br>OS=Agrobacterium phage Milano<br>OX=2557550<br>GN=Milano_031<br>PE=4 SV=1   | 32.0 %          | 3214<br>1 | 480          |
| 1.8        | tr A0A482MFQ9 A0A482MFQ9_9CAU<br>D | DNA-circularization protein<br>OS=Agrobacterium phage Milano<br>OX=2557550<br>GN=Milano_025<br>PE=4 SV=1 | 26.4 %          | 4339<br>2 | 441          |



|          |                                    |                                                                                                                               |                                                                                       |           |     |
|----------|------------------------------------|-------------------------------------------------------------------------------------------------------------------------------|---------------------------------------------------------------------------------------|-----------|-----|
| 1.9      | tr A0A482MF64 A0A482MF64_9CAUD     | Prohead protease<br>OS=Agrobacteriu<br>m phage Milano<br>OX=2557550<br>GN=Milano_008<br>PE=4 SV=1                             | 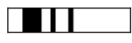   | 2872<br>4 | 400 |
|          |                                    |                                                                                                                               | 24.2 %                                                                                |           |     |
| 1.1<br>0 | tr A0A482MHL8 A0A482MHL8_9CAU<br>D | Head-to-tail<br>connector<br>complex protein<br>OS=Agrobacteriu<br>m phage Milano<br>OX=2557550<br>GN=Milano_014<br>PE=4 SV=1 |    | 2244<br>7 | 341 |
|          |                                    |                                                                                                                               | 44.1 %                                                                                |           |     |
| 1.1<br>1 | tr A0A482MFR0 A0A482MFR0_9CAU<br>D | Virion-associated<br>protein<br>OS=Agrobacteriu<br>m phage Milano<br>OX=2557550<br>GN=Milano_016<br>PE=4 SV=1                 |    | 2311<br>1 | 327 |
|          |                                    |                                                                                                                               | 40.6 %                                                                                |           |     |
| 1.1<br>2 | tr A0A482MFS0 A0A482MFS0_9CAU<br>D | Virion-associated<br>protein<br>OS=Agrobacteriu<br>m phage Milano<br>OX=2557550<br>GN=Milano_010<br>PE=4 SV=1                 |    | 1476<br>1 | 290 |
|          |                                    |                                                                                                                               | 48.9 %                                                                                |           |     |
| 1.1<br>3 | tr A0A482MGH3 A0A482MGH3_9CAU<br>D | Virion-associated<br>protein<br>OS=Agrobacteriu<br>m phage Milano<br>OX=2557550<br>GN=Milano_013<br>PE=4 SV=1                 |  | 3080<br>1 | 286 |
|          |                                    |                                                                                                                               | 16.1 %                                                                                |           |     |
| 1.1<br>4 | tr A0A482MFT7 A0A482MFT7_9CAUD     | Virion-associated<br>protein<br>OS=Agrobacteriu<br>m phage Milano<br>OX=2557550<br>GN=Milano_030<br>PE=4 SV=1                 |  | 3216<br>9 | 284 |
|          |                                    |                                                                                                                               | 36.0 %                                                                                |           |     |
| 1.1<br>5 | tr A0A482MGV0 A0A482MGV0_9CAU<br>D | Putative tail fiber<br>protein<br>OS=Agrobacteriu<br>m phage Milano<br>OX=2557550<br>GN=Milano_124<br>PE=4 SV=1               |  | 6186<br>6 | 277 |
|          |                                    |                                                                                                                               | 10.4 %                                                                                |           |     |
| 1.1<br>6 | tr A0A482MGG2 A0A482MGG2_9CAU<br>D | Uncharacterized<br>protein<br>OS=Agrobacteriu<br>m phage Milano<br>OX=2557550<br>GN=Milano_003<br>PE=4 SV=1                   |  | 4854<br>5 | 230 |
|          |                                    |                                                                                                                               | 22.0 %                                                                                |           |     |

|          |                                    |                                                                                                               |                                                                                       |           |     |
|----------|------------------------------------|---------------------------------------------------------------------------------------------------------------|---------------------------------------------------------------------------------------|-----------|-----|
| 1.1<br>7 | Unknown_structurally_identified    | nan<br>gp28                                                                                                   |    | 1962<br>8 | 201 |
|          |                                    |                                                                                                               | 20.8 %                                                                                |           |     |
| 1.1<br>8 | tr A0A482MFQ3 A0A482MFQ3_9CAU<br>D | Head completion<br>protein<br>OS=Agrobacteriu<br>m phage Milano<br>OX=2557550<br>GN=Milano_015<br>PE=4 SV=1   |    | 1619<br>1 | 194 |
|          |                                    |                                                                                                               | 35.5 %                                                                                |           |     |
| 1.1<br>9 | tr A0A482MF73 A0A482MF73_9CAUD     | Virion-associated<br>protein<br>OS=Agrobacteriu<br>m phage Milano<br>OX=2557550<br>GN=Milano_018<br>PE=4 SV=1 |    | 2034<br>9 | 180 |
|          |                                    |                                                                                                               | 23.0 %                                                                                |           |     |
| 1.2<br>0 | tr A0A482MG23 A0A482MG23_9CAU<br>D | Virion-associated<br>protein<br>OS=Agrobacteriu<br>m phage Milano<br>OX=2557550<br>GN=Milano_127<br>PE=4 SV=1 |    | 1418<br>3 | 179 |
|          |                                    |                                                                                                               | 30.8 %                                                                                |           |     |
| 1.2<br>1 | tr A0A482MFZ0 A0A482MFZ0_9CAU<br>D | Baseplate protein<br>OS=Agrobacteriu<br>m phage Milano<br>OX=2557550<br>GN=Milano_027<br>PE=4 SV=1            |    | 2073<br>9 | 133 |
|          |                                    |                                                                                                               | 17.0 %                                                                                |           |     |
| 1.2<br>2 | tr A0A482MFS1 A0A482MFS1_9CAU<br>D | Baseplate hub<br>protein<br>OS=Agrobacteriu<br>m phage Milano<br>OX=2557550<br>GN=Milano_026<br>PE=4 SV=1     |  | 4978<br>8 | 123 |
|          |                                    |                                                                                                               | 8.1 %                                                                                 |           |     |
| 1.2<br>3 | tr A0A482MHX6 A0A482MHX6_9CAU<br>D | Uncharacterized<br>protein<br>OS=Agrobacteriu<br>m phage Milano<br>OX=2557550<br>GN=Milano_125<br>PE=4 SV=1   |  | 1453<br>6 | 93  |
|          |                                    |                                                                                                               | 29.8 %                                                                                |           |     |

**Table S4:** Intra-chain disulfide bonds in Milano tail and baseplate structure

|                          |        |        |
|--------------------------|--------|--------|
| Sheath (gp20)            | Cys26  | Cys303 |
|                          | Cys73  | Cys320 |
|                          | Cys217 | Cys249 |
|                          | Cys75  | Cys300 |
| Baseplate wedge 2 (gp29) | Cys69  | Cys181 |
|                          | Cys173 | Cys212 |
|                          | Cys223 | Cys374 |
|                          | Cys250 | Cys379 |
| Baseplate wedge 3 (gp30) | Cys33  | Cys66  |
|                          | Cys125 | Cys264 |
|                          | Cys212 | Cys277 |
| Short tail fiber (gp31)  | Cys12  | Cys20  |

**Table S5:** Cryo-EM data collection and refinement statistics of Milano tail and baseplate junction structures

|                                                     | Curved tail     | Baseplate       | Contracted tube                                                | Contracted sheath                                               |
|-----------------------------------------------------|-----------------|-----------------|----------------------------------------------------------------|-----------------------------------------------------------------|
| PDB entry                                           | 8FOP            | 8FQC            | 8FOU                                                           | 8FOY                                                            |
| EMBD entry                                          | 29353           | 29383           | 29354                                                          | 29355                                                           |
| Voltage (kV)                                        | 300             | 300             | 300                                                            | 300                                                             |
| Magnification (x)                                   | 81,000          | 81,000          | 105,000                                                        | 105,000                                                         |
| Electron exposure (e <sup>-</sup> /Å <sup>2</sup> ) | 50              | 50              | 48                                                             | 48                                                              |
| Pixel size (Å/pixel)                                | 1.08            | 1.08            | 0.82                                                           | 0.82                                                            |
| Particle images (no.)                               | 228,393         | 14,856          | 160,399                                                        | 160,399                                                         |
| Box size (Å)                                        | 384             | 578             | 512                                                            | 512                                                             |
| <b>Symmetry imposed</b>                             |                 |                 |                                                                |                                                                 |
|                                                     | Point group: C1 | Point group: C3 | Helical<br>Rise: 34.068 Å<br>Twist: 28.164°<br>Point group: C6 | Helical<br>Rise: 23.934 Å<br>Twist: -30.562°<br>Point group: C6 |
| <b>Map global resolution (Å)</b>                    |                 |                 |                                                                |                                                                 |
| Map:map Fourier shell correlation (FSC, 0.143)      | 3.2 Å           | 3.2 Å           | 3.3 Å                                                          | 2.9 Å                                                           |
| Model:map FSC (0.5)                                 | 3.5 Å           | 3.4 Å           | 3.5 Å                                                          | 2.9 Å                                                           |
| <b>Refinement and model validation</b>              |                 |                 |                                                                |                                                                 |
| Clash score                                         | 9.37            | 10.20           | 8.88                                                           | 9.08                                                            |
| <b>R.M.D deviations</b>                             |                 |                 |                                                                |                                                                 |
| Bond Length (Å)                                     | 0.003           | 0.007           | 0.003                                                          | 0.009                                                           |
| Bond Angle (°)                                      | 0.563           | 0.793           | 0.602                                                          | 0.783                                                           |
| <b>Ramachandran plot (%)</b>                        |                 |                 |                                                                |                                                                 |
| Outliers                                            | 0.57            | 0.75            | 0.00                                                           | 0.20                                                            |
| Allowed                                             | 7.14            | 8.75            | 4.80                                                           | 9.04                                                            |
| Favoured                                            | 92.29           | 90.49           | 95.20                                                          | 90.76                                                           |
| <b>Model vs. Data fit</b>                           |                 |                 |                                                                |                                                                 |
| CC (mask)                                           | 0.80            | 0.85            | 0.85                                                           | 0.90                                                            |
| CC (Volume)                                         | 0.79            | 0.84            | 0.83                                                           | 0.89                                                            |

## References

1. Pieri, L. et al. Atomic structure of Lanreotide nanotubes revealed by cryo-EM. *Proc Natl Acad Sci U S A* **119**(2022).
2. Chen, Z.-L. et al. A high-speed search engine pLink 2 with systematic evaluation for proteome-scale identification of cross-linked peptides. *Nature communications* **10**, 3404 (2019).
